# Supplementary material
Source: Elsevier journal article supplement (https://rcastoragev2.blob.core.windows.net/cf0ff0fc355bd8c993eb8a01c2f10911/mmc1.pdf)
Supplement: mmc1 [file mmc1.pdf]

# THE LANCET Oncology

## Supplementary appendix

This appendix formed part of the original submission and has been peer reviewed.  
We post it as supplied by the authors.

Supplement to: Cunningham D, Stenning SP, Smyth EC, et al. Peri-operative chemotherapy with or without bevacizumab in operable oesophagogastric adenocarcinoma (UK Medical Research Council ST03): primary analysis results of a multicentre, open-label, randomised phase 2–3 trial. *Lancet Oncol* 2017; published online Feb 2. [http://dx.doi.org/10.1016/S1470-2045\(17\)30043-8](http://dx.doi.org/10.1016/S1470-2045(17)30043-8).

**A randomised phase II/III trial of perioperative chemotherapy with or without  
bevacizumab in operable oesophagogastric adenocarcinoma: Final results from the UK  
Medical Research Council randomised ST03 trial**

**Supplementary data**

**Appendix table 1: Centre Recruitment and Principal Investigator Details**

| Centre                                        | Principal Investigator   | Patients randomised |
|-----------------------------------------------|--------------------------|---------------------|
| Christie Hospital                             | Dr Was Mansoor           | 48                  |
| Bristol Oncology Centre                       | Dr Stephen Falk          | 46                  |
| Freeman Hospital, Newcastle                   | Dr Fareeda Coxon         | 46                  |
| Weston Park Hospital                          | Dr Suzanne Darby         | 44                  |
| Royal Surrey County Hospital                  | Dr Sebastian Cummins     | 42                  |
| Birmingham Heartlands                         | Dr Joyce Thompson        | 41                  |
| St James University Hospital                  | Dr Matthew Seymour       | 36                  |
| Russell's Hall Hospital                       | Dr David Ferry           | 30                  |
| Norfolk and Norwich University Hospital       | Dr Jenny Nobes           | 29                  |
| Leicester Royal Infirmary                     | Dr Anne Thomas           | 27                  |
| Guy's Hospital                                | Dr Paul Ross             | 25                  |
| Maidstone Hospital                            | Dr Justin Waters         | 25                  |
| Queen Elizabeth, Birmingham                   | Dr Victoria Kunene       | 25                  |
| Royal Marsden Hospital (Sutton)               | Prof David Cunningham    | 25                  |
| St Bart's Hospital                            | Dr Sarah Slater          | 25                  |
| Clatterbridge Centre for Oncology             | Dr Adrian Moss           | 23                  |
| University Hospital Coventry and Warwickshire | Dr Sharmila Sothi        | 20                  |
| Royal Marsden Hospital (London)               | Prof David Cunningham    | 19                  |
| Aberdeen Royal Infirmary                      | Dr Russell Petty         | 18                  |
| Huddersfield Royal Infirmary                  | Dr Jo Dent               | 17                  |
| Velindre Hospital                             | Dr Tom Crosby            | 17                  |
| Royal Bournemouth Hospital                    | Dr Tom Geldart           | 16                  |
| University Hospital of North Staffordshire    | Dr Fawzi Adab            | 16                  |
| Castle Hill Hospital                          | Dr Mohan Hingorani       | 15                  |
| Churchill Hospital                            | Dr Kinnari Patel         | 14                  |
| Nottingham University Hospital                | Dr Srinivasan Madhusudan | 14                  |
| Wexham Park Hospital                          | Dr Maher Hadaki          | 14                  |
| Belfast City Hospital                         | Dr Martin Eatock         | 13                  |
| Cumberland Infirmary                          | Dr Jonathon Nicoll       | 13                  |
| Musgrove Park Hospital                        | Dr Emma Cattell          | 13                  |
| Queen's Hospital, Romford                     | Dr Sherif Raouf          | 13                  |
| Royal Berkshire Hospital                      | Dr Joss Adams            | 13                  |
| Royal United Hospital                         | Dr Louise Medley         | 13                  |
| Salisbury District Hospital                   | Dr Tim Iveson            | 13                  |
| St Mary's Hospital, London                    | Dr Danielle Power        | 13                  |
| Worthing Hospital                             | Dr Andrew Webb           | 13                  |
| Beatson Oncology Centre                       | Prof Jeff Evans          | 12                  |
| Bradford Royal Infirmary                      | Dr Sue Cheeseman         | 12                  |

| Centre                             | Principal Investigator  | Patients randomised |
|------------------------------------|-------------------------|---------------------|
| Cheltenham General                 | Dr Sean Elyan           | 12                  |
| Great Western Hospital             | Dr Claire Blesing       | 10                  |
| Addenbrooke's Hospital             | Dr Hugo Ford            | 9                   |
| Derriford Hospital                 | Dr Sarah Pascoe         | 8                   |
| James Paget University Hospital    | Dr Ulrike Dervedde      | 8                   |
| Royal Lancaster Infirmary          | Dr David Fyfe           | 8                   |
| Scarborough General Hospital       | Dr Mohan Hingorani      | 8                   |
| Southampton General Hospital       | Dr Tim Iveson           | 7                   |
| Alexandra Hospital, Redditch       | Dr Sharmila Sothi       | 6                   |
| Poole Hospital                     | Dr Richard Osborne      | 6                   |
| Royal Preston Hospital             | Dr Muthu Sivaramalingam | 6                   |
| St George's Hospital               | Dr Tim Benepal          | 6                   |
| Torbay Hospital                    | Dr Nicole Dorey         | 6                   |
| Countess of Chester Hospital       | Dr Shaker Abdallah      | 5                   |
| Glan Clwyd Hospital                | Dr Angel Garcia-Alonso  | 5                   |
| Gloucestershire Royal Hospital     | Dr Sean Elyan           | 5                   |
| Peterborough City Hospital         | Dr Karen McAdam         | 5                   |
| Queen Alexandra Hospital           | Dr Caroline Archer      | 5                   |
| Hereford County Hospital           | Dr Nick Reed            | 4                   |
| Lincoln County Hospital            | Dr Zuzanna Stokes       | 4                   |
| Northampton General Hospital       | Dr Somnath Mukherjee    | 4                   |
| St Mary's Hospital, Newport        | Dr Judith Cave          | 4                   |
| University Hospital Aintree        | Dr Helen Neville-Webbe  | 4                   |
| Ysbyty Gwynedd (Bangor Hospital)   | Dr Rachel Williams      | 4                   |
| Airedale General Hospital          | Dr Sue Cheeseman        | 3                   |
| Broomfield Hospital                | Dr Saad Tahir           | 3                   |
| Burnley General Hospital           | Dr Ajay Mehta           | 3                   |
| Darent Valley Hospital             | Dr Riyaz Shah           | 3                   |
| Dorset County Hospital             | Dr Mike Bayne           | 3                   |
| Furness General Hospital           | Dr David Fyfe           | 3                   |
| Hairmyres Hospital                 | Dr Vivienne Maclaren    | 3                   |
| Halton Hospital                    | Dr Adrian Moss          | 3                   |
| Royal Blackburn Hospital           | Dr Ajay Mehta           | 3                   |
| Royal Cornwall Hospital            | Dr Richard Ellis        | 3                   |
| Royal Devon and Exeter             | Dr Liz Toy              | 3                   |
| Royal Sussex County Hospital       | Dr Andrew Webb          | 3                   |
| Worcestershire Royal Hospital      | Dr Charles Candish      | 3                   |
| Basingstoke Hospital               | Dr Charlotte Rees       | 2                   |
| North Middlesex Hospital           | Dr John Bridgewater     | 2                   |
| Stafford General Hospital          | Dr Apurna Jegannathan   | 2                   |
| University College London Hospital | Dr John Bridgewater     | 2                   |
| Wrexham Maelor Hospital            | Dr Simon Gollins        | 2                   |
| Doncaster Royal Infirmary          | Dr Jonathan Wadsley     | 1                   |
| Pilgrim Hospital                   | Dr Zuzanna Stokes       | 1                   |
| Princess Alexandra Hospital        | Dr John Bridgewater     | 1                   |

| <b>Centre</b>                   | <b>Principal Investigator</b> | <b>Patients randomised</b> |
|---------------------------------|-------------------------------|----------------------------|
| Royal Free Hospital             | Dr Astrid Mayer               | 1                          |
| Royal Hampshire County Hospital | Dr Luke Nolan                 | 1                          |
| Victoria Hospital (Blackpool)   | Dr Muthiah Sivaramalingam     | 1                          |
| Weston General Hospital         | Dr Serena Hillman             | 1                          |
| TOTAL                           |                               | 1063                       |

**Appendix table 2: Pre-operative chemotherapy cycle data**

|                                              |                               | ECX       | ECX+B     |
|----------------------------------------------|-------------------------------|-----------|-----------|
| Patients starting pre-operative chemotherapy |                               | 529       | 525       |
| Chemotherapy status                          | Received all 3 cycles         | 472 (89%) | 463 (88%) |
|                                              | Stopped early                 | 57 (11%)  | 62 (12%)  |
| Reason for stopping early                    | n                             | 57        | 62        |
|                                              | Unacceptable toxicity         | 28 (49%)  | 26 (42%)  |
|                                              | Death during treatment        | 9 (16%)   | 10 (16%)  |
|                                              | Change in patient's condition | 7 (12%)   | 8 (13%)   |
|                                              | Patient's choice              | 3 (5%)    | 2 (3%)    |
|                                              | Tumour progression            | 1 (2%)    | 1 (2%)    |
|                                              | Intercurrent illness          | 0 (0%)    | 1 (2%)    |
|                                              | Other reason                  | 1 (2%)    | 3 (5%)    |
|                                              | Reason missing                | 8 (14%)   | 11 (18%)  |
| Number of cycles started                     | 1                             | 22 (4%)   | 20 (4%)   |
|                                              | 2                             | 35 (7%)   | 42 (8%)   |
|                                              | 3                             | 472 (89%) | 463 (88%) |
| Number of cycles with bevacizumab            | 0                             |           | 2 (<1%)   |
|                                              | 1                             |           | 44 (8%)   |
|                                              | 2                             |           | 74 (14%)  |
|                                              | 3                             |           | 405 (77%) |
| Number of cycles with dose reductions        | 0                             | 344 (65%) | 319 (61%) |
|                                              | 1                             | 118 (22%) | 124 (24%) |
|                                              | 2                             | 58 (11%)  | 70 (13%)  |
|                                              | 3                             | 9 (2%)    | 12 (2%)   |

**Appendix table 3: Post-operative chemotherapy cycle data**

|                                               |                               | ECX       | ECX+B     |
|-----------------------------------------------|-------------------------------|-----------|-----------|
| Patients starting post-operative chemotherapy |                               | 293       | 257       |
| Chemotherapy status                           | Received all 3 cycles         | 215 (73%) | 197 (77%) |
|                                               | Stopped early                 | 78 (27%)  | 60 (23%)  |
| Reason for stopping early                     | n                             | 78        | 60        |
|                                               | Unacceptable toxicity         | 48 (62%)  | 30 (50%)  |
|                                               | Patient's choice              | 15 (19%)  | 12 (20%)  |
|                                               | Change in patient's condition | 8 (10%)   | 5 (8%)    |
|                                               | Intercurrent illness          | 3 (4%)    | 3 (5%)    |
|                                               | Tumour progression            | 0 (0%)    | 3 (5%)    |
|                                               | Other reason                  | 3 (4%)    | 6 (10%)   |
|                                               | Reason missing                | 1 (1%)    | 1 (2%)    |
| Number of chemo cycles started                | 1                             | 36 (12%)  | 24 (9%)   |
|                                               | 2                             | 42 (14%)  | 34 (13%)  |
|                                               | 3                             | 214 (73%) | 196 (76%) |
|                                               | Missing                       | 1 (<1%)   | 3 (1%)    |
| Number of cycles with bevacizumab             | 0                             |           | 25 (10%)  |
|                                               | 1                             |           | 23 (9%)   |
|                                               | 2                             |           | 35 (14%)  |
|                                               | 3                             |           | 171 (67%) |
|                                               | Missing                       |           | 3 (1%)    |
| Number of cycles with dose reduction          | 0                             | 116 (40%) | 85 (33%)  |
|                                               | 1                             | 76 (26%)  | 86 (33%)  |
|                                               | 2                             | 53 (18%)  | 53 (21%)  |
|                                               | 3                             | 47 (16%)  | 30 (12%)  |
|                                               | Missing                       | 1 (<1%)   | 3 (1%)    |

#### Appendix table 4: Post-operative complications

All patients who underwent a resection had a post-operative assessment approximately six weeks after surgery where details regarding their recovery from the operation were documented. The presence and severity of the complications listed below was evaluated by the local investigator, including whether each complication was felt to be life-threatening or not.

| Complication                               | <u>ECX (N=446)</u> |            |           | <u>ECX+B (N=427)</u> |            |           |
|--------------------------------------------|--------------------|------------|-----------|----------------------|------------|-----------|
|                                            | n                  | %          | LT        | n                    | %          | LT        |
| <b>Any complication (maximum severity)</b> | <b>215</b>         | <b>48%</b> | <b>37</b> | <b>243</b>           | <b>57%</b> | <b>34</b> |
| Respiratory tract infection                | 72                 | 16%        | 6         | 71                   | 17%        | 7         |
| Pleural effusion requiring treatment       | 50                 | 11%        | 5         | 41                   | 10%        | 6         |
| Wound healing complications                | 33                 | 7%         | 3         | 53                   | 12%        | 5         |
| Wound infection (superficial)              | 37                 | 8%         | 2         | 38                   | 9%         | 1         |
| Cardiac complications                      | 23                 | 5%         | 8         | 30                   | 7%         | 6         |
| Respiratory failure                        | 27                 | 6%         | 13        | 23                   | 5%         | 13        |
| Intra-abdominal sepsis                     | 18                 | 4%         | 7         | 17                   | 4%         | 7         |
| Wound infection (deep)                     | 15                 | 3%         | 3         | 12                   | 3%         | 4         |
| Empyema                                    | 9                  | 2%         | 1         | 18                   | 4%         | 4         |
| Haemorrhage requiring intervention         | 13                 | 3%         | 4         | 13                   | 3%         | 7         |
| Pulmonary embolism                         | 7                  | 2%         | 2         | 9                    | 2%         | 1         |
| MRSA (any site)                            | 9                  | 2%         | 0         | 6                    | 1%         | 0         |
| Deep vein thrombosis                       | 3                  | <1%        | 0         | 7                    | 2%         | 1         |
| Other                                      | 109                | 24%        | 14        | 118                  | 28%        | 18        |
|                                            |                    |            |           |                      |            |           |
| Anastomotic leak*                          | 43                 | 9%         |           | 75                   | 18%        |           |
| Revisional operation required              | 39                 | 9%         |           | 37                   | 9%         |           |

n = overall number of complications reported (whether life-threatening or not); % = overall percentage of patients reporting the event in question; LT = number of complications, of those reported, that were deemed to be life-threatening by the local investigator.

\* Severity information was not collected for anastomotic leak so the number of events that were deemed to be life-threatening is not available.

**Appendix table 5: Other causes of death**

| Group                         | Cause of death                                                                                                                                                                   |
|-------------------------------|----------------------------------------------------------------------------------------------------------------------------------------------------------------------------------|
| Chemotherapy alone            | pulmonary embolus DVT stomach carcinoma                                                                                                                                          |
| Chemotherapy alone            | small bowel injunction, oesophageal cancer and diabetes type 2                                                                                                                   |
| Chemotherapy alone            | Admitted with gastro-oesophago-pulmonary fistula to CCU resulting in recurrent thoracic collections & collections + air leak. Died of chest sepsis & severe respiratory failure. |
| Chemotherapy alone            | Cerebral infarction                                                                                                                                                              |
| Chemotherapy alone            | Left ventricular failure, Ischaemic heart disease, Surgery for Adenocarcinoma of Stomach                                                                                         |
| Chemotherapy alone            | right anterior cerebral infarct                                                                                                                                                  |
| Chemotherapy alone            | cerebral haemorrhage - cause unknown                                                                                                                                             |
| Chemotherapy alone            | Cardiac Arrest                                                                                                                                                                   |
| Chemotherapy alone            | Pneumonia                                                                                                                                                                        |
| Chemotherapy alone            | Ia Aspiration pneumonia, b small bowel resection. II Metastatic recurrent gastric cancer                                                                                         |
| Chemotherapy alone            | Community acquired pneumonia                                                                                                                                                     |
| Chemotherapy alone            | severe bilateral bronchopneumonia & recurrent OGJ                                                                                                                                |
| Chemotherapy alone            | Pulmonary thromboembolism. Cardiac arrest                                                                                                                                        |
| Chemotherapy alone            | PT progressed 29/04/2013 confirmed by CT                                                                                                                                         |
| Chemotherapy alone            | Recurrence at anastomosis                                                                                                                                                        |
| Chemotherapy alone            | Middle Cerebral Artery Stroke                                                                                                                                                    |
| Chemotherapy alone            | Liver necrosis secondary cirrhosis as a consequence of serum fatty infiltration (NASH)                                                                                           |
| Chemotherapy alone            | Aspiration Pneumonia                                                                                                                                                             |
| Chemotherapy alone            | Chest sepsis + multi-organ failure                                                                                                                                               |
| Chemotherapy alone            | Delayed haemorrhage following surgery                                                                                                                                            |
| Chemotherapy alone            | Multi-organ failure                                                                                                                                                              |
| Chemotherapy alone            | Pneumonia                                                                                                                                                                        |
| Chemotherapy alone            | Pneumonia                                                                                                                                                                        |
| Chemotherapy plus bevacizumab | unknown, wait outcome of post mortem                                                                                                                                             |
| Chemotherapy plus bevacizumab | Not known                                                                                                                                                                        |
| Chemotherapy plus bevacizumab | heart attack                                                                                                                                                                     |
| Chemotherapy plus bevacizumab | Bronchopneumonia                                                                                                                                                                 |
| Chemotherapy plus bevacizumab | Metastatic Melanoma                                                                                                                                                              |
| Chemotherapy plus bevacizumab | Pneumonia, bronchiectasis & COPD + oesophageal cancer                                                                                                                            |
| Chemotherapy plus bevacizumab | multiple organ failure, neutropenic sepsis and oesophageal Ca (treated with chemo)                                                                                               |
| Chemotherapy plus bevacizumab | Myocardial Infarction-probably due to chemotherapy                                                                                                                               |
| Chemotherapy plus bevacizumab | Pneumonia                                                                                                                                                                        |
| Chemotherapy plus bevacizumab | coronary artery disease                                                                                                                                                          |
| Chemotherapy plus bevacizumab | Coronary artery thrombosis                                                                                                                                                       |
| Chemotherapy plus bevacizumab | eroded aorta                                                                                                                                                                     |
| Chemotherapy plus bevacizumab | Pneumonia and oesophageal ca.                                                                                                                                                    |
| Chemotherapy plus bevacizumab | Ischaemic Heart Disease due to Coronary artery thrombosis due to coronary artery aneurysm                                                                                        |
| Chemotherapy plus bevacizumab | Post mortem findings natural findings                                                                                                                                            |
| Chemotherapy plus bevacizumab | a) Extensive intestinal ischaemia due to antecedent causes b) Internal Intestinal Herniation                                                                                     |
| Chemotherapy plus bevacizumab | Aspiration pneumonia                                                                                                                                                             |
| Chemotherapy plus bevacizumab | metastatic colorectal cancer                                                                                                                                                     |
| Chemotherapy plus bevacizumab | Ia multiorgan failure, Ib thoracic sepsis, Ic oesophageal adenocarcinoma (operated)                                                                                              |
| Chemotherapy plus bevacizumab | coroners case                                                                                                                                                                    |



|                               |                                                                                                                                        |
|-------------------------------|----------------------------------------------------------------------------------------------------------------------------------------|
| Chemotherapy plus bevacizumab | Alcoholic Liver Disease                                                                                                                |
| Chemotherapy plus bevacizumab | cardiac arrest                                                                                                                         |
| Chemotherapy plus bevacizumab | Cardiac arrest                                                                                                                         |
| Chemotherapy plus bevacizumab | Bronchopneumonia                                                                                                                       |
| Chemotherapy plus bevacizumab | Disease related and PE                                                                                                                 |
| Chemotherapy plus bevacizumab | pneumonia                                                                                                                              |
| Chemotherapy plus bevacizumab | Unknown -sudden collapse. Attended air ambulance. Vomitus and haemetemesis reported. Unsuccessful resuscitation. No autopsy performed. |
| Chemotherapy plus bevacizumab | Brain stem infarction and frontal lobe haemorrhagic stroke                                                                             |
| Chemotherapy plus bevacizumab | New Primary - Glioblastoma                                                                                                             |
| Chemotherapy plus bevacizumab | Septic post op - died 7 days post surgery                                                                                              |
| Chemotherapy plus bevacizumab | Combined toxic effects of buprenorphine and morphine, Carcinoma of oesophagus                                                          |
| Chemotherapy plus bevacizumab | Acute UGI bleed. Oesophageal ulceration                                                                                                |
| Chemotherapy plus bevacizumab | Unknown - GP contacted but they didnt know                                                                                             |
| Chemotherapy plus bevacizumab | bilateral pneumonia secondary to aspiration                                                                                            |
| Chemotherapy plus bevacizumab | Heart attack                                                                                                                           |

**Appendix table 6: Description of revisional operations in patients suffering post-operative anastomotic leak**

| Group                         | Description of revisional operation                                                                                                                                               |
|-------------------------------|-----------------------------------------------------------------------------------------------------------------------------------------------------------------------------------|
| Chemotherapy alone            | laparotomy and washout plus feeding jejunostomy                                                                                                                                   |
| Chemotherapy alone            | anastomotic leak                                                                                                                                                                  |
| Chemotherapy alone            | laparotomy, small bowel and caecalexcision & jejunostomy on 8/12/10                                                                                                               |
| Chemotherapy alone            | Laparotomy closed                                                                                                                                                                 |
| Chemotherapy alone            | right thoracotomy                                                                                                                                                                 |
| Chemotherapy alone            | To stop bleeding                                                                                                                                                                  |
| Chemotherapy alone            | Op1: Division of anastomosis, resection of ischaemic segment of conduit. Op2: Venting gastrotomy & oesophagectomy on 03.08.2012. Op3: Reconstitution of small bowel on 20.08.2012 |
| Chemotherapy alone            | 1st thoractomy. 2nd laparotomy                                                                                                                                                    |
| Chemotherapy alone            | Missing                                                                                                                                                                           |
| Chemotherapy alone            | re-laparotomy lavage,                                                                                                                                                             |
| Chemotherapy alone            | Laparotomy for anastomastic leak                                                                                                                                                  |
| Chemotherapy alone            | Wedge resection of transverse colon                                                                                                                                               |
| Chemotherapy alone            | Hemi hepatectomy - showed cirrhosis & infarction                                                                                                                                  |
| Chemotherapy alone            | thoracoscopy/pouch revision/washout                                                                                                                                               |
| Chemotherapy alone            | Laparoscopy and reduction of transient at hernia and coloplasty. 2. and 3. Closure of abdominal wound dehiscence                                                                  |
| Chemotherapy alone            | Rt Thoracotomy-gastric staple                                                                                                                                                     |
| Chemotherapy alone            | Thoracotomy and T-tube                                                                                                                                                            |
| Chemotherapy alone            | washant and drains inserted                                                                                                                                                       |
| Chemotherapy alone            | To repair anastomotic leak                                                                                                                                                        |
| Chemotherapy alone            | Thoractomy                                                                                                                                                                        |
| Chemotherapy alone            | Missing                                                                                                                                                                           |
| Chemotherapy alone            | ogd anastomatic repair                                                                                                                                                            |
| Chemotherapy plus bevacizumab | repair of anastamotic leak                                                                                                                                                        |
| Chemotherapy plus bevacizumab | Repair of anastomotic leaks                                                                                                                                                       |
| Chemotherapy plus bevacizumab | Patient had a repair of anastomotic leak via thoracotomy                                                                                                                          |
| Chemotherapy plus bevacizumab | STENT INSERTION X2                                                                                                                                                                |
| Chemotherapy plus bevacizumab | Anastomotic leak post oesophagectomy re-do                                                                                                                                        |
| Chemotherapy plus bevacizumab | Perforation at anastomosis sutured                                                                                                                                                |
| Chemotherapy plus bevacizumab | thoracotomy & wash out                                                                                                                                                            |
| Chemotherapy plus bevacizumab | Laparoscopy, laparotomy and gastroscopy (29/04/2010) and laparotomy and tracheostomy on 08/05/2010                                                                                |
| Chemotherapy plus bevacizumab | Laparotomy + jejunostomy tube                                                                                                                                                     |
| Chemotherapy plus bevacizumab | Thoracotomy, lapratomy venting gastrostomy                                                                                                                                        |
| Chemotherapy plus bevacizumab | Insertion of oesophageal stent                                                                                                                                                    |
| Chemotherapy plus bevacizumab | Laparotomy,defunctioning stoma and mucus fistula                                                                                                                                  |
| Chemotherapy plus bevacizumab | washout for abcess and leak                                                                                                                                                       |
| Chemotherapy plus bevacizumab | Anastomotic leak repair                                                                                                                                                           |
| Chemotherapy plus bevacizumab | Re look Right thoracotomy                                                                                                                                                         |
| Chemotherapy plus bevacizumab | Anastomotic dehiscence + displaced jejunostomy                                                                                                                                    |
| Chemotherapy plus bevacizumab | Re-adjustment of an oesophageal t-tube inserted due to anastomotic leak                                                                                                           |
| Chemotherapy plus bevacizumab | anastomotic Leak                                                                                                                                                                  |
| Chemotherapy plus bevacizumab | Segmented transverse colectomy                                                                                                                                                    |

|                               |                                                                                                                                                                                 |
|-------------------------------|---------------------------------------------------------------------------------------------------------------------------------------------------------------------------------|
| Chemotherapy plus bevacizumab | Right thoractomy and over sewing anastomotic site                                                                                                                               |
| Chemotherapy plus bevacizumab | Right thoracotomy + decortication                                                                                                                                               |
| Chemotherapy plus bevacizumab | Laparoscopic washout                                                                                                                                                            |
| Chemotherapy plus bevacizumab | thoractomy, pleural lavage, mobilisation of gastric conduit and oesophagus, laparotomy and repatriation of stomach, exploration of left neck with exteriorisation of oesophagus |
| Chemotherapy plus bevacizumab | Laparotomy                                                                                                                                                                      |

**Acknowledgements**

We are grateful to the following persons who participated in the design, conduct and management of the ST03 trial.

**MRC CTU at UCL staff:**

Senior scientist/programme lead: Ruth Langley; Project lead/senior statistician: Sally Stenning; Clinical project managers: Lizzie Armstrong, Laura Farrelly, Michelle Gabriel; Trial managers: Rahela Choudhury, Monica Mascarenhas, Claire Robb, Laura Stevenson, Monica Verma; Trial statisticians: Fay Cafferty, Chetan Mistry, Matthew Nankivell, Sam Rowley, Lindsay Thompson; Data managers: Alanna Brown, Alex Chambers, Matthew Fsadni, Katherine Goodall, Linda Ly, Leah Meaden, Dipa Noor, Sara Smart; Data management services: William Cragg, Carlos Diaz Montana, Brendan Mauger

**Trial Management Group:**

David Cunningham, William H. Allum, Elizabeth Smyth, Alicia Okines, Heike I. Grabsch, Derek Alderson, Thomas Crosby, Robert Mason, S. Michael Griffin, Kate Sumpter, Jane Blazeby, Angela Riddell, Sue Chua

**Independent Data Monitoring Committee:**

John Bancewicz, Pippa Corrie, Mike Hallissey, Janet Dunn

**Independent Trial Steering Committee:**

Chris Parker, Philip Johnson, Robin Rudd, Jeremy Whelan, Daniel Fink

**Other advisors/collaborators:**

Chris Plummer, Yu Jo Chua

**Investigators at participating centres:**

Aberdeen Royal Infirmary (Russell Petty, Leslie Samuel, Sharon Armstrong, Judith Crawford, Asa Dahle-Smith, Ken Park);  
Addenbrooke's Hospital (Hugo Ford, David Gilligan, Susan Harden, Simon Derryhouse, Richard Hardwick, Peter Safranek);  
Airedale General Hospital (Simon Brown, Ganesan Jeyasangar, Clara Sentamans);  
Alexandra Hospital (Kamalayan Gupta);  
Basingstoke and North Hampshire Hospital (Charlotte Rees, Tony Dhillon, Andrew Jackson, Rasheid Mekki);  
Beatson West of Scotland Cancer Centre (Jeffrey RJ Evans, Janet Graham, Clinton Ali, Peter Correa, Ashita Waterston, Matthew Forshaw, Grant Fullerton);  
Belfast City Hospital (Martin Eatock, Claire Harrison, Robert Harte, Paul Henry, Russell Houston, Richard Park, Colin Purcell, Declan Carey, Andrew Kennedy);  
Birmingham Heartlands Hospital (Joyce Thompson, Harish Kumar, Martin Richardson);  
Bradford Royal Infirmary (Sue Cheeseman, Jay Gokhale, John May);  
Bristol Haematology & Oncology Centre (Stephen Falk);  
Bristol Royal Infirmary (Paul Barham, Jane Blazeby);  
Broomfield Hospital (Saad Tahir, Gopikrishnan Srinivasan, Michael Harvey, Sri Kadiramanathan);  
Castle Hill Hospital (Mohan Hingorani, Rajarshi Roy, Martin Gough, Prashant Jain, David Mitton, Elnazeer Salim);  
Cheltenham General Hospital (Sean Elyan);  
Christie Hospital (Robert Hawkins, Was Mansoor, Fiona Thistlethwaite);  
Churchill Hospital (Kinnari Patel, Nicola Warner, R Marshall, Bruno Sgromo);  
Clatterbridge Centre for Oncology (Adrian Moss, David B Smith, Brian Haylock, Rosemary Lord, Julie O'Hagan, Andrew Masters);  
Countess of Chester Hospital (Shaker Abdallah, Jim Evans, David Monk);  
County Hospital (Caroline Connolly, Apurna Jegannathan);  
Cumberland Infirmary (Jonathan Nicoll, Simon Raimes, John Wayman);  
Darent Valley Hospital (Jasvinder Kaur, Andrew Visioli, Haythem Ali);  
Derriford Hospital (Geoffrey Cogill, Sarah Pascoe, Matt Symonds, Joseph Rahamin, Tim Wheatley);  
Doncaster Royal Infirmary (Jonathan Wadsley, Srinivasan Balchandra, George Jacob, Clive Kelty);  
Dorset County Hospital (Michael Bayne);  
Freeman Hospital (Fareeda Coxon, Philip Atherton, Paula Mulvenna, Kate Sumpter);  
Furness General Hospital (Chris Ball);  
Glan Clwyd Hospital (Angel Garcia-Alonso);  
Gloucestershire Royal Hospital (Hugh Barr, Mark Vipond);

Great Western Hospital (Claire Blesing);  
 Guy's Hospital (London) (Nick Maisey, Paul Ross, Ruhe Chowdhury, Fangfei Gao, Cinta Hierro, Debra Joseph, David Landau, Sarah Ngan, Abrie Botha);  
 Hairmyres Hospital (Vivienne Maclaren);  
 Halton Hospital (Amy Ford);  
 Hereford County Hospital (Nick Reed);  
 Huddersfield Royal Infirmary (Jo Dent, Chris Fosker, Uschi Hofmann, Emma Woodward);  
 James Paget Hospital (Ulrike Dervede, Zacharias Tasigiannopoulos);  
 John Radcliffe Hospital (Nick Maynard);  
 Leicester Royal Infirmary (Anne Thomas, Christopher Sutton);  
 Lincoln County Hospital (Zuzana Stokes, Thomas Sheehan, David Andrew);  
 Liverpool Heart and Chest Hospital (Nathan Howes);  
 Maidstone Hospital (Justin Waters, Sam Chan, Mathilda Cominos, Mark Hill, Emma Kipps, Alicia Okines, Shazza Rehman, Timothy Sevvitt, Riyaz Shah, Anand Sharma, Alicia Synowiec, Kiruthikah Thillai, Ahmed Hamouda);  
 Manchester Royal Infirmary (Alan Li, Robert Pearson);  
 Musgrove Park Hospital (Emma Cattell, Julie Walther, Hilary Barlow, Erica Beaumont, Mary Tighe);  
 Norfolk and Norwich University Hospital (Jenny Nobes, Tom Roques);  
 North Middlesex Hospital (John Bridgewater, Cheng Yeoh);  
 Northampton General Hospital (Roshan Agarwal, Gerard Andrade, Somnath Mukherjee, Rachel Gabitass);  
 Nottingham University Hospitals, City Campus (Srinivasan Madhusudan, Eleanor James);  
 Peterborough City Hospital (Sarah Ayers);  
 Peterborough District Hospital (Karen McAdam, Catherine Jephcott, Marie Waters, Kamarul Zaki);  
 Pilgrim Hospital (Alfredo Addeo);  
 Poole Hospital (Richard Osborne, Shorland Hosking, David Tarver);  
 Princess Alexandra Hospital (Harlow) (Lucinda Melcher);  
 Queen Alexandra Hospital (Caroline Archer, Mya Gyi, Kudingila Madhava, Stuart Mercer, Shaw Somers, Simon Toh);  
 Queen Elizabeth Hospital (Birmingham) (Victoria Kunene, David Peake, Derek Alderson, David Gourevitch, John Whiting);  
 Queen's Hospital (Romford) (Sherif Raouf, David Khoo, Dipankar Mokherjee);  
 Rochdale Infirmary (Khurshid Akhtar, Siba Senapati);  
 Royal Berkshire Hospital (Joss Adams, James Gildersleve, Ruth Davis, Shahid Sharif, Michael Booth, Thomas Dehn);  
 Royal Blackburn Hospital (Wiebke Appel);  
 Royal Bournemouth Hospital (Tom Geldart, George Astras, Tamas Hickish, David Bennett, Nick Davies);  
 Royal Cornwall Hospital (Richard Ellis);  
 Royal Devon and Exeter Hospital (Elizabeth Toy, Richard Berrisford, Martin Cooper, Saj Wajad, Saj Wajed);  
 Royal Free Hospital (Astrid Mayer, Roopinder Gillmore);  
 Royal Hallamshire Hospital (Roger Ackroyd, Chris Stoddard, Andrew Wyman);  
 Royal Hampshire County Hospital (Luke Nolan, Rao Vuyyuru);  
 Royal Lancaster Infirmary (David Fyfe);  
 Royal Liverpool University Hospital (Mark Hartley);  
 Royal Marsden Hospital (London) (Ian Chau);  
 Royal Marsden Hospital (Sutton) (David Cunningham, Sheela Rao);  
 Royal Preston Hospital (Muthu Siva(Sivaramalingam), Ajay Mehta, Elaine Young, Christopher Ball, Paul Turner, Jeremy Ward);  
 Royal Stoke Hospital (Fawzi Adab, Arshad Jamil, Duncan Beardsmore, Chandra Cheruvu, William Crisp, M Deakin, Damien Durkin);  
 Royal Surrey County Hospital (Sebastian Cummins, Gary Middleton, Shaun R Preston, Oliver Priest, Yuen Soon);  
 Royal Sussex County Hospital (Andrew Webb, Rebecca Herbertson, Ruth Langley, Geoff Newman, Angus Robinson, PC Hale, Don Manifold);  
 Royal United Hospital (Louise Medley, Tania Tillett, Emma De Winton, Abigail Jenner, Susan Masson, Richard Krysztopik);  
 Royal Victoria Hospital (Belfast) (Barry Clements);  
 Russells Hall Hospital (David Ferry, Mano Joseph, Muhammed Khan, Philip Earwaker, Lalit Pallan);  
 Salford Royal Hospital (Laura Formela);  
 Salisbury District Hospital (Adityanarayan Bhatnagar, Melanie Harvey);  
 Scarborough General Hospital (Georgios Bozas, Amandeep Dhadha);

Southampton General Hospital (Tim Iveson, Andrew Bateman, Ian Bailey, James Byrne);  
 St Bartholomews Hospital (London) (David Propper, Sarah Slater, Marco Gerlinger, Gargi Patel, Frances Hughes);  
 St George's Hospital (London) (Taqdir (Tim) Benepal);  
 St James University Hospital (Leeds) (Matt Seymour, Alan Anthoney, Daniel Swinson, Simon Dexter, Jeremy Hayden, Abeezar Sarela, Henry Sue-Ling);  
 St Mary's Hospital (London) (Danielle Power);  
 St Mary's Hospital (Newport) (Judith Cave, Prokopios Dimopoulos);  
 St Thomas's Hospital (London) (Robert Mason);  
 Tameside General Hospital (Abduljalil Benhamida);  
 Torbay District General Hospital (Nicole Dorey, Rajaguru Srinivasan, Grant Sanders);  
 University College Hospital (Daniel Hochhauser, Khaled Dawas, Mughal Muntzer);  
 University Hospital Aintree (Helen Neville-Webbe, Chan Ton, Graeme Poston);  
 University Hospital Coventry and Warwickshire (Sharmila Sothi, Martin Scott-Brown, Vinod Menon, Lam Chin Tan);  
 Velindre Hospital (Tom Crosby, Alison Brewster, Carys Morgan);  
 Victoria Hospital (Blackpool) (Pavel Bezcny);  
 Warrington Hospital (Martin Brett);  
 Weston General Hospital (Serena Hilman, Marjorie Tomlinson, Tom Wells);  
 Weston Park Hospital (Suzanne Darby, Linda Evans, Debra Furniss, Lucy Walkington);  
 Wexham Park Hospital (Maher Hadaki, Marcia Hall, Catherine Harris, Bob Soin);  
 Wishaw General Hospital (Hakim Ben Younes);  
 Worcestershire Royal Hospital (Charlie Candish);  
 Worthing Hospital (Khaled Hamdan, Krishna Singh);  
 Wrexham Maelor Hospital (Simon Gollins);  
 Wythenshawe Hospital (Ian Welch);  
 Ysbyty Gwynedd (Rachel Williams, Catherine Bale, Claire Fuller, Anna Mullard, Nick Stuart);
